# Supplementary material for: Correlates of domestic violence perpetration reporting among recently-married men residing in slums in Pune, India
Source: PubMed Central journal article supplement (PMC5957364; doi:10.1371/journal.pone.0197303), 2018-05-17
Supplement: pone.0197303.s001.pdf [file pone.0197303.s001.pdf]

### Healthy Relationships Survey (Men)

|                                                                                                                                                                                                                                                                                                                                                                                                                                                                                       |  |  |  |
|---------------------------------------------------------------------------------------------------------------------------------------------------------------------------------------------------------------------------------------------------------------------------------------------------------------------------------------------------------------------------------------------------------------------------------------------------------------------------------------|--|--|--|
| Participant ID: IPV-M- <table border="1"><tr><td> </td><td> </td><td> </td></tr></table> Date: _____                                                                                                                                                                                                                                                                                                                                                                                  |  |  |  |
|                                                                                                                                                                                                                                                                                                                                                                                                                                                                                       |  |  |  |
| Interviewer's name : _____ Interviewer's signature _____                                                                                                                                                                                                                                                                                                                                                                                                                              |  |  |  |
| Start time _____                                                                                                                                                                                                                                                                                                                                                                                                                                                                      |  |  |  |
| The first set of questions asks general questions about you, your spouse, and family. Please select the answer choice most fitting. As we proceed, let me know if you would like me to repeat a question at any point. Also let me know if you don't feel comfortable answering a particular question and we will move on. Are you ready to begin?                                                                                                                                    |  |  |  |
| 1. Age <ul style="list-style-type: none"><li>• Years completed _____ <input type="checkbox"/></li><li>• Estimated age (years completed) _____</li></ul>                                                                                                                                                                                                                                                                                                                               |  |  |  |
| 2. Age of spouse <ul style="list-style-type: none"><li>• Years completed _____</li><li>• Estimated age (years completed) _____</li><li>• Refuse to answer _____ 99</li></ul>                                                                                                                                                                                                                                                                                                          |  |  |  |
| 3. Highest level of education completed: <ul style="list-style-type: none"><li>• Illiterate _____ 1</li><li>• Functional literate _____ 2</li><li>• Primary education (Up to 7th standard) _____ 3</li><li>• Secondary education (8th – 10th standard) _____ 4</li><li>• Higher secondary education (11<sup>th</sup>-12<sup>th</sup> standard) _____ 5</li><li>• Beyond graduate (12<sup>th</sup> pass) education _____ 6</li><li>• Refuse to answer _____ 99</li></ul>               |  |  |  |
| 4. Additional training completed (like technical degree, vocational training, diploma course) <ul style="list-style-type: none"><li>• Yes _____ 1</li><li>• No _____ 0</li><li>• Refuse to answer _____ 99</li></ul>                                                                                                                                                                                                                                                                  |  |  |  |
| 5. Highest level of education <u>spouse</u> completed: <ul style="list-style-type: none"><li>• Illiterate _____ 1</li><li>• Functional literate _____ 2</li><li>• Primary education (Up to 7th standard) _____ 3</li><li>• Secondary education (8th – 10th standard) _____ 4</li><li>• Higher secondary education (11<sup>th</sup>-12<sup>th</sup> standard) _____ 5</li><li>• Beyond graduate (12<sup>th</sup> pass) education _____ 6</li><li>• Refuse to answer _____ 99</li></ul> |  |  |  |

6. Additional training spouse completed (like technical degree, vocational training, diploma course)

- Yes \_\_\_\_\_ 1
- No \_\_\_\_\_ 0
- Refuse to answer \_\_\_\_\_ 99

7. Participant employed?

- Yes \_\_\_\_\_, 1 Specify \_\_\_\_\_
- No \_\_\_\_\_ 0
- Refuse to answer \_\_\_\_\_ 99

8. Spouse employed?

- Yes \_\_\_\_\_, 1 Specify \_\_\_\_\_
- No (housewife) \_\_\_\_\_ 0
- Refuse to answer \_\_\_\_\_ 99

9. Monthly income of participant

- NIL \_\_\_\_\_ 0
- Less than 2000 \_\_\_\_\_ 1
- Rs. 2000-4000 \_\_\_\_\_ 2
- Rs 4000-6000 \_\_\_\_\_ 3
- Rs. 6000-8000 \_\_\_\_\_ 4
- Rs. 8000-10000 \_\_\_\_\_ 5
- More than Rs 10000 \_\_\_\_\_ 6
- I don't know \_\_\_\_\_ 97
- Refuse to answer \_\_\_\_\_ 99

10. Monthly income of spouse

- NIL \_\_\_\_\_ 0
- Less than 2000 \_\_\_\_\_ 1
- Rs. 2000-4000 \_\_\_\_\_ 2
- Rs 4000-6000 \_\_\_\_\_ 3
- Rs. 6000-8000 \_\_\_\_\_ 4
- Rs. 8000-10000 \_\_\_\_\_ 5
- More than Rs 10000 \_\_\_\_\_ 6
- I don't know \_\_\_\_\_ 97
- Refuse to answer \_\_\_\_\_ 99

11. Type of family (at present): (*read options aloud*)

- Nuclear family \_\_\_\_\_ 1
- Joint family \_\_\_\_\_ 2
- Extended family \_\_\_\_\_ 3
- Extended/ joint family with separate kitchen \_\_\_\_\_ 4
- Live with friends \_\_\_\_\_ 5
- Refuse to answer \_\_\_\_\_ 99

12. Number of members in household (at present) \_\_\_\_\_

13. In what type of family did you spend most of your life before marriage? (*read options aloud*)

- Nuclear family \_\_\_\_\_ 1
- Joint family \_\_\_\_\_ 2
- Extended family \_\_\_\_\_ 3
- Extended/ joint family with separate kitchen \_\_\_\_\_ 4
- Lived with friends \_\_\_\_\_ 5
- Orphanage \_\_\_\_\_ 6
- Refuse to answer \_\_\_\_\_ 99

14. Total number of spouse's pregnancies

- Pregnancies \_\_\_\_\_
- Refuse to answer \_\_\_\_\_ 99

*(Should equal answer to #15. If pregnancies=0, then skip to #16)*

15. Outcomes of pregnancies [*indicate number*]

- Live births \_\_\_\_\_
- Planned abortions \_\_\_\_\_
- Unplanned abortions/still births \_\_\_\_\_
- Currently pregnant ('1' if yes, '0' if no) \_\_\_\_\_
- Refuse to answer \_\_\_\_\_ 99

16. Religion

- Hindu \_\_\_\_\_ 1
- Muslim \_\_\_\_\_ 2
- Christian \_\_\_\_\_ 3
- Bodh \_\_\_\_\_ 4
- Jain \_\_\_\_\_ 5
- Sikkh \_\_\_\_\_ 6
- Atheist (no belief in existence of God) \_\_\_\_\_ 7
- Other (specify) \_\_\_\_\_ 8
- Refuse to answer \_\_\_\_\_ 99

The next questions ask about who in a marital relationship should have a greater say in various decisions. These questions are not necessarily about your relationship, but about marital relationships in general. We want to know that, in a couple, who you think should have the greatest say in each of the following decisions.

|                                                          | Mainly the husband =1 | Mainly the wife=2 | Both equally=3 | Someone else=4 | I don't know=97 | Refuse to answer=99 |
|----------------------------------------------------------|-----------------------|-------------------|----------------|----------------|-----------------|---------------------|
| 17. Health care of the wife                              | 1                     | 2                 | 3              | 4              | 97              | 99                  |
| 18. Major household purchases                            | 1                     | 2                 | 3              | 4              | 97              | 99                  |
| 19. Purchases for daily household needs                  | 1                     | 2                 | 3              | 4              | 97              | 99                  |
| 20. Visits to a wife's family or relatives               | 1                     | 2                 | 3              | 4              | 97              | 99                  |
| 21. What to do with the money a wife earns from her work | 1                     | 2                 | 3              | 4              | 97              | 99                  |
| 22. Whether to have children                             | 1                     | 2                 | 3              | 4              | 97              | 99                  |
| 23. How many children to have                            | 1                     | 2                 | 3              | 4              | 97              | 99                  |
| 24. Whether to use contraception                         | 1                     | 2                 | 3              | 4              | 97              | 99                  |
| 25. Which contraception to use                           | 1                     | 2                 | 3              | 4              | 97              | 99                  |

Sometimes a husband is annoyed or angered by things his spouse does. In your opinion, is a husband justified in beating his spouse if in the following situations:

26. She goes out without telling him

- Yes\_\_\_\_\_1
- No\_\_\_\_\_0
- Refuse to answer\_\_\_\_\_99

27. She neglects the house or children

- Yes\_\_\_\_\_1
- No\_\_\_\_\_0
- Refuse to answer\_\_\_\_\_99

28. She argues with him

- Yes\_\_\_\_\_1
- No\_\_\_\_\_0
- Refuse to answer\_\_\_\_\_99

29. She refuses to have sexual intercourse with him.

- Yes\_\_\_\_\_1
- No\_\_\_\_\_0
- Refuse to answer\_\_\_\_\_99

30. She doesn't cook properly

- Yes\_\_\_\_\_1
- No\_\_\_\_\_0
- Refuse to answer\_\_\_\_\_99

31. He suspects she is unfaithful.

- Yes\_\_\_\_\_1
- No\_\_\_\_\_0
- Refuse to answer\_\_\_\_\_99

32. She shows disrespect for in-laws

- Yes\_\_\_\_\_1
- No\_\_\_\_\_0
- Refuse to answer\_\_\_\_\_99

33. She breaks something expensive on purpose or by mistake

- Yes\_\_\_\_\_1
- No\_\_\_\_\_0
- Refuse to answer\_\_\_\_\_99

34. The couple is unable to have a child

- Yes\_\_\_\_\_1
- No\_\_\_\_\_0
- Refuse to answer\_\_\_\_\_99

35. Why might it be justifiable for a husband to hit his wife if the couple is unable to have a child?

---

---

---

- Refuse to answer\_\_\_\_\_99

36. The couple is unable to have a male child

- Yes\_\_\_\_\_1
- No\_\_\_\_\_0
- Refuse to answer\_\_\_\_\_99

37. Why might it be justifiable for a husband to hit his wife if the couple is unable to have a male child?

\_\_\_\_\_

\_\_\_\_\_

\_\_\_\_\_

- Refuse to answer\_\_\_\_\_99

So, now I'm going to give you different situations. In each situation a wife refused to have sex with her husband. Tell me how much you agree with her action.

|                                                              | Not at all=1 | Very little=2 | Some what=3 | To a great extent =4 | Refuse to answer=99 |
|--------------------------------------------------------------|--------------|---------------|-------------|----------------------|---------------------|
| 38. She knew her husband has a sexually transmitted disease. | 1            | 2             | 3           | 4                    | 99                  |
| 39. She knew her husband has sex with other women.           | 1            | 2             | 3           | 4                    | 99                  |
| 40. She was tired or not in the mood.                        | 1            | 2             | 3           | 4                    | 99                  |

The next set of questions are a little bit tough and require concentration, but your answers are very important for us to understand the definition of violence. After this section, the survey will become light-hearted. Ready?

No matter how good a relationship we have with our family, sometimes there are disagreements or problems. The following questions ask about various freedoms a wife may experience during her married life. You will be given particular situations of curbing a wife's freedom. For each situation, I will ask you 3 questions:

- 1) To what extent should it be considered violence if a husband or his family does not allow his wife to engage in the freedom?
- 2) In your relatives or friends, are you aware of this restriction on a married woman?
- 3) In the past 3 months of your married life, how often has your wife been able to exercise the freedom without you or your family bothering her?

| Situation                                                               | To what extent should it be considered violence if a husband or his family does not allow his wife to [insert situation]? |                     |                         |                       |                                                          | <i>In your relatives or friends, are you aware of this restriction on a married woman?</i> |          |                                                          | <i>Thinking about the past 3 months of your married life how often has your wife been able to [insert scenario] without you or your family bothering her?</i>                         |                                                |                 |             |                                                          |  |
|-------------------------------------------------------------------------|---------------------------------------------------------------------------------------------------------------------------|---------------------|-------------------------|-----------------------|----------------------------------------------------------|--------------------------------------------------------------------------------------------|----------|----------------------------------------------------------|---------------------------------------------------------------------------------------------------------------------------------------------------------------------------------------|------------------------------------------------|-----------------|-------------|----------------------------------------------------------|--|
|                                                                         | <i>Control over the following things</i>                                                                                  |                     |                         |                       |                                                          |                                                                                            |          |                                                          |                                                                                                                                                                                       | <i>Freely able to do the following things:</i> |                 |             |                                                          |  |
|                                                                         | Not violence<br>=1                                                                                                        | Mild violence<br>=2 | Moderate violence=<br>3 | Severe violence<br>=4 | I don't know<br>=97<br>N/A=98<br>Refuse to answer<br>=99 | Yes<br>=1                                                                                  | No<br>=0 | I don't know<br>=97<br>N/A=98<br>Refuse to answer<br>=99 | Never<br>=1                                                                                                                                                                           | Rarely<br>=2                                   | Sometimes<br>=3 | Often<br>=4 | I don't know<br>=97<br>N/A=98<br>Refuse to answer<br>=99 |  |
| 41. Rest and relax when she wants to                                    | 1                                                                                                                         | 2                   | 3                       | 4                     | DK97<br>NA98<br>R99                                      | 1                                                                                          | 0        | DK97<br>NA98<br>R99                                      | In the <u>past 3 months</u> , how often has <u>your wife</u> been able to rest and relax when she wants to without you or your family bothering her?                                  |                                                |                 |             | DK97<br>NA98<br>R99                                      |  |
|                                                                         | 1                                                                                                                         | 2                   | 3                       | 4                     |                                                          |                                                                                            |          |                                                          | 1                                                                                                                                                                                     | 2                                              | 3               | 4           |                                                          |  |
| 42. Spend her own or her self-earned money on <b>her natal family</b> . | 1                                                                                                                         | 2                   | 3                       | 4                     | DK97<br>NA98<br>R99                                      | 1                                                                                          | 0        | DK97<br>NA98<br>R99                                      | In the <u>past 3 months</u> , how often has <u>your wife</u> been able to spend her own or her self-earned money on <b>her natal family</b> without you or your family bothering her? |                                                |                 |             | DK97<br>NA98<br>R99                                      |  |
|                                                                         | 1                                                                                                                         | 2                   | 3                       | 4                     |                                                          |                                                                                            |          |                                                          | 1                                                                                                                                                                                     | 2                                              | 3               | 4           |                                                          |  |

|                                                                           | Not violence<br>=1 | Mild violence<br>=2 | Moderate violence=<br>3 | Severe violence<br>=4 | DK97<br>NA98<br>R99 | Yes<br>=1 | No<br>=0 | DK97<br>NA98<br>R99 | Never<br>=1                                                                                                                                                                              | Rarely<br>=2 | Sometimes<br>=3 | Often<br>=4 | DK97<br>NA98<br>R99 |
|---------------------------------------------------------------------------|--------------------|---------------------|-------------------------|-----------------------|---------------------|-----------|----------|---------------------|------------------------------------------------------------------------------------------------------------------------------------------------------------------------------------------|--------------|-----------------|-------------|---------------------|
| 43. Spend her own or her self-earned money on <b>her children.</b>        | 1                  | 2                   | 3                       | 4                     | DK97<br>NA98<br>R99 | 1         | 0        | DK97<br>NA98<br>R99 | In the <u>past 3 months</u> , how often has <u>your wife</u> been able to spend her own or self-earned money on <b>her children</b> without you or your family bothering her?            |              |                 |             | DK97<br>NA98<br>R99 |
|                                                                           |                    |                     |                         |                       |                     |           |          |                     | 1                                                                                                                                                                                        | 2            | 3               | 4           | R99                 |
| 44. Spend her own or her self-earned money on <b>her friends.</b>         | 1                  | 2                   | 3                       | 4                     | DK97<br>NA98<br>R99 | 1         | 0        | DK97<br>NA98<br>R99 | In the <u>past 3 months</u> , how often has <u>your wife</u> been able to spend her own or her self-earned money on <b>her friends</b> without you or your family bothering her?         |              |                 |             | DK97<br>NA98<br>R99 |
|                                                                           |                    |                     |                         |                       |                     |           |          |                     | 1                                                                                                                                                                                        | 2            | 3               | 4           | R99                 |
| 45. Spend her own or her self-earned money on <b>her personal things.</b> | 1                  | 2                   | 3                       | 4                     | DK97<br>NA98<br>R99 | 1         | 0        | DK97<br>NA98<br>R99 | In the <u>past 3 months</u> , how often has <u>your wife</u> been able to spend her own or her self-earned money on <b>her personal things</b> without you or your family bothering her? |              |                 |             | DK97<br>NA98<br>R99 |
|                                                                           |                    |                     |                         |                       |                     |           |          |                     | 1                                                                                                                                                                                        | 2            | 3               | 4           | R99                 |
| 46. Take up a new job or remain in her current job if she wants to.       | 1                  | 2                   | 3                       | 4                     | DK97<br>NA98<br>R99 | 1         | 0        | DK97<br>NA98<br>R99 | In the <u>past 3 months</u> , how often has <u>your wife</u> been able to take up a new job or remain in her current job if she wants to without you or your family bothering her?       |              |                 |             | DK97<br>NA98<br>R99 |
|                                                                           |                    |                     |                         |                       |                     |           |          |                     | 1                                                                                                                                                                                        | 2            | 3               | 4           | R99                 |



|                                                                                                          | Not violence =1 | Mild violence =2 | Moderate violence=3 | Severe violence =4 | DK97<br>NA98<br>R99 | Yes =1 | No =0 | DK97<br>NA98<br>R99 | Never =1                                                                                                                                                                                                                | Rarely =2 | Sometimes =3 | Often =4 | DK97<br>NA98<br>R99 |
|----------------------------------------------------------------------------------------------------------|-----------------|------------------|---------------------|--------------------|---------------------|--------|-------|---------------------|-------------------------------------------------------------------------------------------------------------------------------------------------------------------------------------------------------------------------|-----------|--------------|----------|---------------------|
| 47. Go out of the house.                                                                                 | 1               | 2                | 3                   | 4                  | DK97<br>NA98<br>R99 | 1      | 0     | DK97<br>NA98<br>R99 | In the <u>past 3 months</u> , how often has <u>your wife</u> been able to go out of the house without you or your family bothering her?                                                                                 |           |              |          | DK97<br>NA98<br>R99 |
|                                                                                                          |                 |                  |                     |                    |                     |        |       |                     | 1                                                                                                                                                                                                                       | 2         | 3            | 4        | R99                 |
| 48. Visit her natal family, friends, coworkers, relatives or other acquaintances.                        | 1               | 2                | 3                   | 4                  | DK97<br>NA98<br>R99 | 1      | 0     | DK97<br>NA98<br>R99 | In the <u>past 3 months</u> , how often has <u>your wife</u> been able to visit her natal family, friends, coworkers, relatives, or other acquaintances without you or your family bothering her?                       |           |              |          | DK97<br>NA98<br>R99 |
|                                                                                                          |                 |                  |                     |                    |                     |        |       |                     | 1                                                                                                                                                                                                                       | 2         | 3            | 4        | R99                 |
| 49. Talk freely on the phone, send SMS (text) messages, or use social media (like Facebook or WhatsApp). | 1               | 2                | 3                   | 4                  | DK97<br>NA98<br>R99 | 1      | 0     | DK97<br>NA98<br>R99 | In the <u>past 3 months</u> , how often has <u>your wife</u> been able to talk freely on the phone, send SMS (text) messages, or use social media (like Facebook or WhatsApp) without you or your family bothering her? |           |              |          | DK97<br>NA98<br>R99 |
|                                                                                                          |                 |                  |                     |                    |                     |        |       |                     | 1                                                                                                                                                                                                                       | 2         | 3            | 4        | R99                 |
| 50. Seek medical care for herself.                                                                       | 1               | 2                | 3                   | 4                  | DK97<br>NA98<br>R99 | 1      | 0     | DK97<br>NA98<br>R99 | In the <u>past 3 months</u> , how often has <u>your wife</u> been able to seek medical care for herself without you or your family bothering her?                                                                       |           |              |          | DK97<br>NA98<br>R99 |
|                                                                                                          |                 |                  |                     |                    |                     |        |       |                     | 1                                                                                                                                                                                                                       | 2         | 3            | 4        | R99                 |

|                                                                                                                                                        | Not violence =1 | Mild violence =2 | Moderate violence=3 | Severe violence =4 | DK97<br>NA98<br>R99 | Yes =1 | No =0 | DK97<br>NA98<br>R99 | Never =1                                                                                                                                                                                                                                                              | Rarely =2 | Sometimes =3 | Often =4 | DK97<br>NA98<br>R99 |
|--------------------------------------------------------------------------------------------------------------------------------------------------------|-----------------|------------------|---------------------|--------------------|---------------------|--------|-------|---------------------|-----------------------------------------------------------------------------------------------------------------------------------------------------------------------------------------------------------------------------------------------------------------------|-----------|--------------|----------|---------------------|
| 51. Make her own decisions about family-planning such as getting pregnant, using contraception, spacing between children, and permanent sterilization. | 1               | 2                | 3                   | 4                  | DK97<br>NA98<br>R99 | 1      | 0     | DK97<br>NA98<br>R99 | In the <u>past 3 months</u> , how often has <u>your wife</u> been able to make her own decisions about family-planning such as getting pregnant, using contraception, spacing between children, and permanent sterilization without you or your family bothering her? |           |              |          | DK97<br>NA98<br>R99 |
|                                                                                                                                                        |                 |                  |                     |                    |                     |        |       |                     | 1                                                                                                                                                                                                                                                                     | 2         | 3            | 4        |                     |
| 52. Wear any type of dress and have any style that she wants besides <i>sari</i> .                                                                     | 1               | 2                | 3                   | 4                  | DK97<br>NA98<br>R99 | 1      | 0     | DK97<br>NA98<br>R99 | In the <u>past 3 months</u> , how often has <u>your wife</u> been able to wear any type of dress and have any style that she wants besides <i>sari</i> without you or your family bothering her?                                                                      |           |              |          | DK97<br>NA98<br>R99 |
|                                                                                                                                                        |                 |                  |                     |                    |                     |        |       |                     | 1                                                                                                                                                                                                                                                                     | 2         | 3            | 4        |                     |
| 53. Freely invite her natal family members and friends to visit her in her matrimonial home.                                                           | 1               | 2                | 3                   | 4                  | DK97<br>NA98<br>R99 | 1      | 0     | DK97<br>NA98<br>R99 | In the <u>past 3 months</u> , how often has <u>your wife</u> been able to freely invite her natal family members and friends to visit her matrimonial home without you or your family bothering her?                                                                  |           |              |          | DK97<br>NA98<br>R99 |
|                                                                                                                                                        |                 |                  |                     |                    |                     |        |       |                     | 1                                                                                                                                                                                                                                                                     | 2         | 3            | 4        |                     |

|                                                                                                                                                                                                                                                                                                                                                                                                                                                                                                                                                                                                | Not violence =1                                                                                                                  | Mild violence =2 | Moderate violence=3 | Severe violence =4 | DK97<br>NA98<br>R99                                | Yes =1                                                                                         | No =0 | DK97<br>NA98<br>R99                                | Never =1                                                                                                                                               | Rarely =2 | Sometimes =3                                       | Often =4 | DK97<br>NA98<br>R99 |                                                    |
|------------------------------------------------------------------------------------------------------------------------------------------------------------------------------------------------------------------------------------------------------------------------------------------------------------------------------------------------------------------------------------------------------------------------------------------------------------------------------------------------------------------------------------------------------------------------------------------------|----------------------------------------------------------------------------------------------------------------------------------|------------------|---------------------|--------------------|----------------------------------------------------|------------------------------------------------------------------------------------------------|-------|----------------------------------------------------|--------------------------------------------------------------------------------------------------------------------------------------------------------|-----------|----------------------------------------------------|----------|---------------------|----------------------------------------------------|
| 54. Have sex how and when she wants to.                                                                                                                                                                                                                                                                                                                                                                                                                                                                                                                                                        | 1                                                                                                                                | 2                | 3                   | 4                  | DK97<br>NA98<br>R99                                | 1                                                                                              | 0     | DK97<br>NA98<br>R99                                | In the <u>past 3 months</u> , how often has <u>your wife</u> been able to have sex how and when she wants to without you or your family bothering her? |           |                                                    |          | DK97<br>NA98<br>R99 |                                                    |
|                                                                                                                                                                                                                                                                                                                                                                                                                                                                                                                                                                                                |                                                                                                                                  |                  |                     |                    |                                                    |                                                                                                |       |                                                    | 1                                                                                                                                                      | 2         | 3                                                  | 4        |                     |                                                    |
| <p>The following questions again ask about the relationship between a husband and his wife or the husband's family and his wife. For each scenario we want to know:</p> <ol style="list-style-type: none"> <li>To what extent should it be considered violence if a husband or a member of his family does one of the following to his wife?</li> <li>In your relatives or friends are you aware of this happening to a married woman?</li> <li>In the <u>past 3 months</u> of your married life have <u>you</u> or a member of your family done the following to <u>your wife</u>?</li> </ol> |                                                                                                                                  |                  |                     |                    |                                                    |                                                                                                |       |                                                    |                                                                                                                                                        |           |                                                    |          |                     |                                                    |
| Situation                                                                                                                                                                                                                                                                                                                                                                                                                                                                                                                                                                                      | To what extent should it be considered violence if a <u>husband</u> or <u>his family</u> does the following to his <u>wife</u> ? |                  |                     |                    |                                                    | In your <u>relatives</u> or <u>friends</u> are you aware of this happening to a married woman? |       |                                                    | In the <u>past 3 months</u> of your married life have <u>you</u> or <u>your family</u> done the following to <u>your wife</u> ?                        |           |                                                    |          |                     |                                                    |
|                                                                                                                                                                                                                                                                                                                                                                                                                                                                                                                                                                                                | Not violence=1                                                                                                                   | Mild violence=2  | Moderate violence=3 | Severe violence=4  | I don't know =97<br>N/A=98<br>Refuse to answer =99 | Yes=1                                                                                          | No=0  | I don't know =97<br>N/A=98<br>Refuse to answer =99 | Yes=1                                                                                                                                                  | No=0      | I don't know =97<br>N/A=98<br>Refuse to answer =99 | Yes=1    | No=0                | I don't know =97<br>N/A=98<br>Refuse to answer =99 |
| 55. Screamed at her when she was alone.                                                                                                                                                                                                                                                                                                                                                                                                                                                                                                                                                        | 1                                                                                                                                | 2                | 3                   | 4                  | DK97<br>NA98<br>R99                                | 1                                                                                              | 0     | DK97<br>NA98<br>R99                                | 1                                                                                                                                                      | 0         | DK97<br>NA98<br>R99                                | 1        | 0                   | DK97<br>NA98<br>R99                                |

|                                                                                                            | Not<br>violence=1 | Mild<br>violence=2 | Moderate<br>violence=3 | Severe<br>violence=4 | DK97<br>NA98<br>R99 | Yes=1<br>No=0 | DK97<br>NA98<br>R99 | Yes=1<br>No=0 | DK97<br>NA98<br>R99 |
|------------------------------------------------------------------------------------------------------------|-------------------|--------------------|------------------------|----------------------|---------------------|---------------|---------------------|---------------|---------------------|
| 56. Excessively criticized her for her work at home                                                        | 1                 | 2                  | 3                      | 4                    | DK97<br>NA98<br>R99 | 1<br>0        | DK97<br>NA98<br>R99 | 1<br>0        | DK97<br>NA98<br>R99 |
| 57. Screamed at her or insulted her in front of others, in a public place, or on a social networking site. | 1                 | 2                  | 3                      | 4                    | DK97<br>NA98<br>R99 | 1<br>0        | DK97<br>NA98<br>R99 | 1<br>0        | DK97<br>NA98<br>R99 |
| 58. <b>Threatened</b> to send her out of the house.                                                        | 1                 | 2                  | 3                      | 4                    | DK97<br>NA98<br>R99 | 1<br>0        | DK97<br>NA98<br>R99 | 1<br>0        | DK97<br>NA98<br>R99 |
| 59. Forced her to leave the house.                                                                         | 1                 | 2                  | 3                      | 4                    | DK97<br>NA98<br>R99 | 1<br>0        | DK97<br>NA98<br>R99 | 1<br>0        | DK97<br>NA98<br>R99 |
| 60. <b>Threatened</b> to send her to her natal home against her will.                                      | 1                 | 2                  | 3                      | 4                    | DK97<br>NA98<br>R99 | 1<br>0        | DK97<br>NA98<br>R99 | 1<br>0        | DK97<br>NA98<br>R99 |
| 61. Sent her to her natal home against her will                                                            | 1                 | 2                  | 3                      | 4                    | DK97<br>NA98<br>R99 | 1<br>0        | DK97<br>NA98<br>R99 | 1<br>0        | DK97<br>NA98<br>R99 |

|                                                                                                                     | Not violence=1 | Mild violence=2 | Moderate violence=3 | Severe violence=4 | DK97<br>NA98<br>R99 | Yes=1 | No=0 | DK97<br>NA98<br>R99 | Yes=1 | No=0 | DK97<br>NA98<br>R99 |
|---------------------------------------------------------------------------------------------------------------------|----------------|-----------------|---------------------|-------------------|---------------------|-------|------|---------------------|-------|------|---------------------|
| 62. Harassed <b>her</b> for wedding-related gifts or money such as <i>maanpaan</i> or dowry.                        | 1              | 2               | 3                   | 4                 | DK97<br>NA98<br>R99 | 1     | 0    | DK97<br>NA98<br>R99 | 1     | 0    | DK97<br>NA98<br>R99 |
| 63. Harassed <b>her natal family</b> for wedding-related gifts or money such as <i>maanpaan</i> or dowry.           | 1              | 2               | 3                   | 4                 | DK97<br>NA98<br>R99 | 1     | 0    | DK97<br>NA98<br>R99 | 1     | 0    | DK97<br>NA98<br>R99 |
| 64. Taunted her about her poor health.                                                                              | 1              | 2               | 3                   | 4                 | DK97<br>NA98<br>R99 | 1     | 0    | DK97<br>NA98<br>R99 | 1     | 0    | DK97<br>NA98<br>R99 |
| 65. Threatened to hurt or hurt her <b>children</b> because the husband or his family were angry with her.           | 1              | 2               | 3                   | 4                 | DK97<br>NA98<br>R99 | 1     | 0    | DK97<br>NA98<br>R99 | 1     | 0    | DK97<br>NA98<br>R99 |
| 66. Threatened to hurt or hurt a <b>member of her family</b> because the husband or his family were angry with her. | 1              | 2               | 3                   | 4                 | DK97<br>NA98<br>R99 | 1     | 0    | DK97<br>NA98<br>R99 | 1     | 0    | DK97<br>NA98<br>R99 |

|                                                                         | Not<br>violence=1 | Mild<br>violence=2 | Moderate<br>violence=3 | Severe<br>violence=4 | DK97<br>NA98<br>R99 | Yes=1<br>No=0 | DK97<br>NA98<br>R99 | Yes=1<br>No=0 | DK97<br>NA98<br>R99 |
|-------------------------------------------------------------------------|-------------------|--------------------|------------------------|----------------------|---------------------|---------------|---------------------|---------------|---------------------|
| 67. Threatened to leave her and get remarried.                          | 1                 | 2                  | 3                      | 4                    | DK97<br>NA98<br>R99 | 1<br>0        | DK97<br>NA98<br>R99 | 1<br>0        | DK97<br>NA98<br>R99 |
| 68. Intentionally spread false rumors about her character and chastity. | 1                 | 2                  | 3                      | 4                    | DK97<br>NA98<br>R99 | 1<br>0        | DK97<br>NA98<br>R99 | 1<br>0        | DK97<br>NA98<br>R99 |
| 69. Intentionally ignored her or did not talk to her.                   | 1                 | 2                  | 3                      | 4                    | DK97<br>NA98<br>R99 | 1<br>0        | DK97<br>NA98<br>R99 | 1<br>0        | DK97<br>NA98<br>R99 |
| 70. Intentionally starved her or gave her stale food.                   | 1                 | 2                  | 3                      | 4                    | DK97<br>NA98<br>R99 | 1<br>0        | DK97<br>NA98<br>R99 | 1<br>0        | DK97<br>NA98<br>R99 |
| 71. Intentionally confined her in the house.                            | 1                 | 2                  | 3                      | 4                    | DK97<br>NA98<br>R99 | 1<br>0        | DK97<br>NA98<br>R99 | 1<br>0        | DK97<br>NA98<br>R99 |
| 72. Intentionally left her out of family functions or social events.    | 1                 | 2                  | 3                      | 4                    | DK97<br>NA98<br>R99 | 1<br>0        | DK97<br>NA98<br>R99 | 1<br>0        | DK97<br>NA98<br>R99 |

|                                                                          | Not violence=1 | Mild violence=2 | Moderate violence=3 | Severe violence=4 | DK97<br>NA98<br>R99 | Yes=1 | No=0 | DK97<br>NA98<br>R99 | Yes=1 | No=0 | DK97<br>NA98<br>R99 |
|--------------------------------------------------------------------------|----------------|-----------------|---------------------|-------------------|---------------------|-------|------|---------------------|-------|------|---------------------|
| 73. Bothered her for having a girl child.                                | 1              | 2               | 3                   | 4                 | DK97<br>NA98<br>R99 | 1     | 0    | DK97<br>NA98<br>R99 | 1     | 0    | DK97<br>NA98<br>R99 |
| 74. Bothered her for being infertile.                                    | 1              | 2               | 3                   | 4                 | DK97<br>NA98<br>R99 | 1     | 0    | DK97<br>NA98<br>R99 | 1     | 0    | DK97<br>NA98<br>R99 |
| 75. Forced her to become vegetarian or non-vegetarian.                   | 1              | 2               | 3                   | 4                 | DK97<br>NA98<br>R99 | 1     | 0    | DK97<br>NA98<br>R99 | 1     | 0    | DK97<br>NA98<br>R99 |
| 76. Forced her to fast (perform <i>upvas</i> ) when she did not want to. | 1              | 2               | 3                   | 4                 | DK97<br>NA98<br>R99 | 1     | 0    | DK97<br>NA98<br>R99 | 1     | 0    | DK97<br>NA98<br>R99 |
| 77. Forced her to work excessively against her will.                     | 1              | 2               | 3                   | 4                 | DK97<br>NA98<br>R99 | 1     | 0    | DK97<br>NA98<br>R99 | 1     | 0    | DK97<br>NA98<br>R99 |
| 78. Slapped or scratched her.                                            | 1              | 2               | 3                   | 4                 | DK97<br>NA98<br>R99 | 1     | 0    | DK97<br>NA98<br>R99 | 1     | 0    | DK97<br>NA98<br>R99 |

|                                                                       | Not violence=1 | Mild violence=2 | Moderate violence=3 | Severe violence=4 | DK97<br>NA98<br>R99 | Yes=1 | No=0 | DK97<br>NA98<br>R99 | Yes=1 | No=0 | DK97<br>NA98<br>R99 |
|-----------------------------------------------------------------------|----------------|-----------------|---------------------|-------------------|---------------------|-------|------|---------------------|-------|------|---------------------|
| 79. Kicked, punched, or beat her.                                     | 1              | 2               | 3                   | 4                 | DK97<br>NA98<br>R99 | 1     | 0    | DK97<br>NA98<br>R99 | 1     | 0    | DK97<br>NA98<br>R99 |
| 80. Twisted her arm or pulled her hair.                               | 1              | 2               | 3                   | 4                 | DK97<br>NA98<br>R99 | 1     | 0    | DK97<br>NA98<br>R99 | 1     | 0    | DK97<br>NA98<br>R99 |
| 81. Pushed her, pulled her, dragged her, shook her, or held her down. | 1              | 2               | 3                   | 4                 | DK97<br>NA98<br>R99 | 1     | 0    | DK97<br>NA98<br>R99 | 1     | 0    | DK97<br>NA98<br>R99 |
| 82. Tried to strangle or suffocate her.                               | 1              | 2               | 3                   | 4                 | DK97<br>NA98<br>R99 | 1     | 0    | DK97<br>NA98<br>R99 | 1     | 0    | DK97<br>NA98<br>R99 |
| 83. Tried to hang her.                                                | 1              | 2               | 3                   | 4                 | DK97<br>NA98<br>R99 | 1     | 0    | DK97<br>NA98<br>R99 | 1     | 0    | DK97<br>NA98<br>R99 |
| 84. Tried to poison her.                                              | 1              | 2               | 3                   | 4                 | DK97<br>NA98<br>R99 | 1     | 0    | DK97<br>NA98<br>R99 | 1     | 0    | DK97<br>NA98<br>R99 |



|                                                                                                          | Not<br>violence=1 | Mild<br>violence=2 | Moderate<br>violence=3 | Severe<br>violence=4 | DK97<br>NA98<br>R99 | Yes=1<br>No=0 | DK97<br>NA98<br>R99 | Yes=1<br>No=0 | DK97<br>NA98<br>R99 |
|----------------------------------------------------------------------------------------------------------|-------------------|--------------------|------------------------|----------------------|---------------------|---------------|---------------------|---------------|---------------------|
| 85. Threw things in the house when my family or I were angry with her.                                   | 1                 | 2                  | 3                      | 4                    | DK97<br>NA98<br>R99 | 1<br>0        | DK97<br>NA98<br>R99 | 1<br>0        | DK97<br>NA98<br>R99 |
| 86. Burnt her or threatened to burn her with a cigarette or bidi.                                        | 1                 | 2                  | 3                      | 4                    | DK97<br>NA98<br>R99 | 1<br>0        | DK97<br>NA98<br>R99 | 1<br>0        | DK97<br>NA98<br>R99 |
| 87. <b>Threatened</b> to burn her using kerosene, chemicals, acid, or some other method.                 | 1                 | 2                  | 3                      | 4                    | DK97<br>NA98<br>R99 | 1<br>0        | DK97<br>NA98<br>R99 | 1<br>0        | DK97<br>NA98<br>R99 |
| 88. Burned her using kerosene, chemicals, acid, or some other method.                                    | 1                 | 2                  | 3                      | 4                    | DK97<br>NA98<br>R99 | 1<br>0        | DK97<br>NA98<br>R99 | 1<br>0        | DK97<br>NA98<br>R99 |
| 89. <b>Threatened</b> her with a <b>sharp object</b> such as broken glass, a razor blade, axe, or knife. | 1                 | 2                  | 3                      | 4                    | DK97<br>NA98<br>R99 | 1<br>0        | DK97<br>NA98<br>R99 | 1<br>0        | DK97<br>NA98<br>R99 |
| 90. Attacked her with a <b>sharp object</b> such as broken glass, a razor blade, axe, or knife.          | 1                 | 2                  | 3                      | 4                    | DK97<br>NA98<br>R99 | 1<br>0        | DK97<br>NA98<br>R99 | 1<br>0        | DK97<br>NA98<br>R99 |

|                                                                                                         | Not violence=1 | Mild violence=2 | Moderate violence=3 | Severe violence=4 | DK97<br>NA98<br>R99 | Yes=1 | No=0 | DK97<br>NA98<br>R99 | Yes=1 | No=0 | DK97<br>NA98<br>R99 |
|---------------------------------------------------------------------------------------------------------|----------------|-----------------|---------------------|-------------------|---------------------|-------|------|---------------------|-------|------|---------------------|
| 91. <b>Threatened</b> her with a <b>blunt object</b> such as a belt, stone, broomstick, or rolling pin. | 1              | 2               | 3                   | 4                 | DK97<br>NA98<br>R99 | 1     | 0    | DK97<br>NA98<br>R99 | 1     | 0    | DK97<br>NA98<br>R99 |
| 92. Attacked her with a <b>blunt object</b> such as a belt, stone, broomstick, or rolling pin.          | 1              | 2               | 3                   | 4                 | DK97<br>NA98<br>R99 | 1     | 0    | DK97<br>NA98<br>R99 | 1     | 0    | DK97<br>NA98<br>R99 |
| 93. Forced her to have sex against her will during her <b>menstrual cycle</b> .                         | 1              | 2               | 3                   | 4                 | DK97<br>NA98<br>R99 | 1     | 0    | DK97<br>NA98<br>R99 | 1     | 0    | DK97<br>NA98<br>R99 |
| 94. Forced her to have sex against her will with <b>someone else</b> .                                  | 1              | 2               | 3                   | 4                 | DK97<br>NA98<br>R99 | 1     | 0    | DK97<br>NA98<br>R99 | 1     | 0    | DK97<br>NA98<br>R99 |
| 95. Purposely made her drunk or high on drugs to force her to have sex against her will.                | 1              | 2               | 3                   | 4                 | DK97<br>NA98<br>R99 | 1     | 0    | DK97<br>NA98<br>R99 | 1     | 0    | DK97<br>NA98<br>R99 |
| 96. Forced her to have sex without a <b>condom</b> against her will.                                    | 1              | 2               | 3                   | 4                 | DK97<br>NA98<br>R99 | 1     | 0    | DK97<br>NA98<br>R99 | 1     | 0    | DK97<br>NA98<br>R99 |

|                                                                                          | Not<br>violence=1 | Mild<br>violence=2 | Moderate<br>violence=3 | Severe<br>violence=4 | DK97<br>NA98<br>R99 | Yes=1<br>No=0 | DK97<br>NA98<br>R99 | Yes=1<br>No=0 | DK97<br>NA98<br>R99 |
|------------------------------------------------------------------------------------------|-------------------|--------------------|------------------------|----------------------|---------------------|---------------|---------------------|---------------|---------------------|
| 97. Forced her to replicate a sexual behavior from a pornographic film against her will. | 1                 | 2                  | 3                      | 4                    | DK97<br>NA98<br>R99 | 1<br>0        | DK97<br>NA98<br>R99 | 1<br>0        | DK97<br>NA98<br>R99 |
| 98. Forced her to engage in <b>vaginal</b> sexual intercourse against her will.          | 1                 | 2                  | 3                      | 4                    | DK97<br>NA98<br>R99 | 1<br>0        | DK97<br>NA98<br>R99 | 1<br>0        | DK97<br>NA98<br>R99 |
| 99. Forced her to engage in <b>oral</b> sex against her will.                            | 1                 | 2                  | 3                      | 4                    | DK97<br>NA98<br>R99 | 1<br>0        | DK97<br>NA98<br>R99 | 1<br>0        | DK97<br>NA98<br>R99 |
| 100. Forced her to engage in <b>anal</b> sex against her will.                           | 1                 | 2                  | 3                      | 4                    | DK97<br>NA98<br>R99 | 1<br>0        | DK97<br>NA98<br>R99 | 1<br>0        | DK97<br>NA98<br>R99 |
| 101. Videotaped her and her husband having sex against her will                          | 1                 | 2                  | 3                      | 4                    | DK97<br>NA98<br>R99 | 1<br>0        | DK97<br>NA98<br>R99 | 1<br>0        | DK97<br>NA98<br>R99 |
| 102. Intentionally performed forceful sex to hurt her.                                   | 1                 | 2                  | 3                      | 4                    | DK97<br>NA98<br>R99 | 1<br>0        | DK97<br>NA98<br>R99 | 1<br>0        | DK97<br>NA98<br>R99 |

|                                                                                            | Not violence=1 | Mild violence=2 | Moderate violence=3 | Severe violence=4 | DK97<br>NA98<br>R99 | Yes=1 | No=0 | DK97<br>NA98<br>R99 | Yes=1 | No=0 | DK97<br>NA98<br>R99 |
|--------------------------------------------------------------------------------------------|----------------|-----------------|---------------------|-------------------|---------------------|-------|------|---------------------|-------|------|---------------------|
| 103. Threatened to sexually abuse someone that she cares about if she refused to have sex. | 1              | 2               | 3                   | 4                 | DK97<br>NA98<br>R99 | 1     | 0    | DK97<br>NA98<br>R99 | 1     | 0    | DK97<br>NA98<br>R99 |

The next few questions ask about your marriage.

104. Of the following which best describes your marriage? (*read options aloud*)

- Arranged \_\_\_\_\_ 1
- Love with acceptance by family\_\_2
- Love without acceptance of family\_3
- Refuse to answer\_\_\_\_\_99

105. Caste:

| <b>Marriage</b>                     |               |                         |                        |
|-------------------------------------|---------------|-------------------------|------------------------|
| 105a. Pl mention:                   | 105b.         | 105c. Name of the caste | 105d. Is the caste:    |
| Within Caste_____1                  | Marriage      | through marriage        | Reserved_____1         |
| Intercaste_____2                    | within family | _____                   | Non-reserved____2      |
| I don't know_____97                 | relations?    | Refuse to answer____99  | I don't know_____97    |
| Refuse to answer____99              | Yes____1      |                         | Refuse to answer____99 |
| <i>If inter-caste, skip to 105c</i> | No____0       |                         |                        |
|                                     | Refuse to     |                         |                        |
|                                     | answer        |                         |                        |
|                                     | ____99        |                         |                        |

106. Prior to marriage how much time did you spend alone with your partner (current spouse) face-to-face?

- Duration (\_\_\_ minutes / \_\_\_\_\_ hours/ \_\_\_\_\_ days / \_\_\_\_\_ months / \_\_\_\_\_ years)
- Refuse to answer\_\_\_\_99

107. Prior to marriage how long had you been in contact (for example, by phone, chatting, Whatsapp)?

- Never\_\_\_\_\_1
- $0 < X \leq 2$  weeks\_\_\_\_\_2
- $2 < X \leq 4$  weeks\_\_\_\_\_3
- $1 < X \leq 3$  months\_\_\_\_\_4
- $3 < X \leq 6$  months\_\_\_\_\_5
- $6 < X \leq 9$  months\_\_\_\_\_6
- $9 < X \leq 12$  months\_\_\_\_\_7
- More than 12 months (specify)\_\_\_\_\_8
- Refuse to answer\_\_\_\_\_99

108. How well did you feel you knew your partner (current spouse) at the time of marriage?  
(read options aloud)

- Not at all \_\_\_\_\_ 1
- Very little \_\_\_\_\_ 2
- Somewhat \_\_\_\_\_ 3
- To a great extent \_\_\_\_\_ 4
- Refuse to answer \_\_\_\_\_ 99

109. What have you learned about your spouse that you didn't know at the time of marriage?

\_\_\_\_\_  
\_\_\_\_\_  
\_\_\_\_\_

The next set of questions ask about how you spend your time with your spouse at present.

110. On average, which best describes how much time (outside of sleep) you and your spouse spend together alone?

- Never \_\_\_\_\_ 1
- Every day \_\_\_\_\_ 2 (specify hours per day) \_\_\_\_\_
- 3-4 days each week \_\_\_\_\_ 3 (specify hours per day) \_\_\_\_\_
- Only on weekends and holidays \_\_\_\_\_ 4 (specify hours per day) \_\_\_\_\_
- Refuse to answer \_\_\_\_\_ 99

111. What are the major things you want to accomplish in your life?

- \_\_\_\_\_  
\_\_\_\_\_
- I don't know \_\_\_\_\_ 97
- Refuse to answer \_\_\_\_\_ 99

112. What are the major things your spouse wants to accomplish in her life?

- \_\_\_\_\_  
\_\_\_\_\_
- I don't know \_\_\_\_\_ 97
- Refuse to answer \_\_\_\_\_ 99

113. Thinking about the time you and your spouse spend together and the dreams and goals you just told me about, whose dreams do you prioritize working on?

- The dreams/goals of my spouse \_\_\_\_\_ 1
- My dreams/goals/ \_\_\_\_\_ 2
- Both of our dreams/goals \_\_\_\_\_ 3
- We do not spend time working toward our dreams or goals \_\_\_\_\_ 4
- I don't know \_\_\_\_\_ 97
- Not applicable (We do not dream) \_\_\_\_\_ 98
- Refuse to answer \_\_\_\_\_ 99

Of the following activities you and your spouse may do together, usually, to whose liking and interest are they?

|                              | Of interest to my spouse=1 | Of interest to me=2 | Of interest to both of us=3 | We do not really discuss/do this=4 | Refuse to answer=99 |
|------------------------------|----------------------------|---------------------|-----------------------------|------------------------------------|---------------------|
| 114. Discuss things          | 1                          | 2                   | 3                           | 4                                  | 99                  |
| 115. Do things or activities | 1                          | 2                   | 3                           | 4                                  | 99                  |

116. What are the recreational activities where only the two of you are involved? (*probe*)

\_\_\_\_\_

\_\_\_\_\_

We will now talk about the desired qualities of a husband and wife. I want you to take a minute and picture an "ideal husband" and "ideal wife."

117. Please tell me the 3 most important qualities (i.e. attributes or model behaviors) of an "ideal husband"

1. \_\_\_\_\_
2. \_\_\_\_\_
3. \_\_\_\_\_

118. Please tell me the extent to which you feel you have attained these:

- Not at all \_\_\_\_\_ 1
- Very little \_\_\_\_\_ 2
- Somewhat \_\_\_\_\_ 3
- To a great extent \_\_\_\_\_ 4
- Refuse to answer \_\_\_\_\_ 99

119. Please tell me the 3 most important qualities (i.e. attributes or model behaviors) of an "ideal wife"

1. \_\_\_\_\_
2. \_\_\_\_\_
3. \_\_\_\_\_

120. Please tell me the extent to which you feel your spouse has attained these:

- Not at all \_\_\_\_\_ 1
- Very little \_\_\_\_\_ 2
- Somewhat \_\_\_\_\_ 3
- To a great extent \_\_\_\_\_ 4
- Refuse to answer \_\_\_\_\_ 99

The following questions ask you about your marriage and relationship with your family. We would like to know the level of satisfaction with the following aspects of your marriage.

|                                                                                                                       | Not at all =1 | Very little=2 | Somewhat =3 | To a great extent =4 | I don't know =97 | Not applicable =98 | Refuse to answer =99 |
|-----------------------------------------------------------------------------------------------------------------------|---------------|---------------|-------------|----------------------|------------------|--------------------|----------------------|
| 121. <u>Your</u> satisfaction with your future life partner (current spouse) at the time of marriage                  | 1             | 2             | 3           | 4                    | 97               | 98                 | 99                   |
| 122. <u>Your</u> satisfaction with wedding-related gifts or <i>maanpaan</i> provided at the time of marriage          | 1             | 2             | 3           | 4                    | 97               | 98                 | 99                   |
| 123. <u>Your family's</u> satisfaction with wedding-related gifts or <i>maanpaan</i> provided at the time of marriage | 1             | 2             | 3           | 4                    | 97               | 98                 | 99                   |
| 124. <u>Your</u> satisfaction with how your in-laws have treated you since marriage                                   | 1             | 2             | 3           | 4                    | 97               | 98                 | 99                   |
| 125. <u>Your parents'</u> satisfaction with your spouse as a daughter-in-law since marriage                           | 1             | 2             | 3           | 4                    | 97               | 98                 | 99                   |



The next set of questions asks about how you handled disagreements with your spouse in the past 3 months. Thinking about the past 3 months when you and your spouse had disagreements, please choose how often you did the following.

|                                                                                                | Never=<br>1 | Rarely=<br>2 | Sometimes<br>=3 | Often=<br>4 | I<br>don't<br>know<br>=97 | Not<br>appli<br>cabl<br>e=98 | Refuse<br>to<br>answer<br>=99 |
|------------------------------------------------------------------------------------------------|-------------|--------------|-----------------|-------------|---------------------------|------------------------------|-------------------------------|
| 126. I showed my spouse I cared even though we disagreed                                       | 1           | 2            | 3               | 4           | 97                        | 98                           | 99                            |
| 127. I showed respect for my spouse's feelings about an issue                                  | 1           | 2            | 3               | 4           | 97                        | 98                           | 99                            |
| 128. I said I was sure we could work out a problem                                             | 1           | 2            | 3               | 4           | 97                        | 98                           | 99                            |
| 129. I explained my side of a disagreement to my spouse                                        | 1           | 2            | 3               | 4           | 97                        | 98                           | 99                            |
| 130. I suggested a compromise to a disagreement                                                | 1           | 2            | 3               | 4           | 97                        | 98                           | 99                            |
| 131. I agreed to try a solution to a disagreement my spouse suggested                          | 1           | 2            | 3               | 4           | 97                        | 98                           | 99                            |
| 132. How often do you get upset if your spouse talks with other men <u>within</u> the family?  | 1           | 2            | 3               | 4           | 97                        | 98                           | 99                            |
| 133. How often do you get upset if your spouse talks with other men <u>outside</u> the family? | 1           | 2            | 3               | 4           | 97                        | 98                           | 99                            |

The next few question ask about relationships, sex, and reproductive health.

134. What were the 3 most important sources of information for you about relationships between a husband and wife? *(do not read options aloud)*

- school teacher or school program\_\_\_\_\_1
- spouse\_\_\_\_\_2
- mother\_\_\_\_\_3
- father\_\_\_\_\_4
- brother\_\_\_\_\_5
- sister\_\_\_\_\_6
- other family members\_\_\_\_\_7
- friends\_\_\_\_\_8
- doctor, nurse or counselor\_\_\_\_\_9
- books/magazines\_\_\_\_\_10
- films/videos\_\_\_\_\_11
- internet\_\_\_\_\_12
- mobile clips\_\_\_\_\_13
- other (specify)\_\_\_\_\_14
- I received no information on this topic\_\_\_\_15
- Refuse to answer\_\_\_\_\_99

135. What were the 3 most important sources of information for you on sexual and reproductive systems of men and women and sexual intercourse? *(do not read options aloud)*

- school teacher or school program\_\_\_\_\_1
- spouse\_\_\_\_\_2
- mother\_\_\_\_\_3
- father\_\_\_\_\_4
- brother\_\_\_\_\_5
- sister\_\_\_\_\_6
- other family members\_\_\_\_\_7
- friends\_\_\_\_\_8
- doctor, nurse or counselor\_\_\_\_\_9
- books/magazines\_\_\_\_\_10
- films/videos\_\_\_\_\_11
- internet\_\_\_\_\_12
- mobile clips\_\_\_\_\_13
- other (specify)\_\_\_\_\_14
- I received no information on this topic\_\_\_\_15
- Refuse to answer\_\_\_\_\_99

Please tell me the extent to which you agree with the following statements.

|                                                                               | Not at all=1 | Very little=2 | Somewhat =3 | To a great extent=4 | Refuse to answer =99 |
|-------------------------------------------------------------------------------|--------------|---------------|-------------|---------------------|----------------------|
| 136. I feel confident about my knowledge of sexual intercourse.               | 1            | 2             | 3           | 4                   | 99                   |
| 137. I can let my spouse know when I <u>do not</u> want to have sex with her. | 1            | 2             | 3           | 4                   | 99                   |
| 138. I can let my spouse know when I <u>do want</u> to have sex with her.     | 1            | 2             | 3           | 4                   | 99                   |

139. Think back to the last time you had sex with your spouse, which of the following statements is most fitting: (*read options aloud*)

- I persuaded her to have intercourse\_\_\_\_\_1
- She persuaded me to have intercourse\_\_\_\_\_2
- We were both equally willing\_\_\_\_\_3
- I had intercourse with her against her will\_\_\_\_\_4
- She had intercourse with me against my will\_\_\_\_\_5
- We have not been able to consummate our marriage\_\_\_\_\_6
- Refuse to answer\_\_\_\_\_99

140. Have you ever used any contraceptive?

- Yes\_\_\_\_\_1
- No\_\_\_\_\_0
- Refuse to answer\_\_\_\_\_99

141. Did you ever discuss contraception with your spouse?

- Yes\_\_\_\_\_1
- No\_\_\_\_\_0
- Refuse to answer\_\_\_\_\_99

142. Have you ever had sexual relations with someone outside of your spouse?

- Yes\_\_\_\_\_1
- No\_\_\_\_\_0
- Refuse to answer\_\_\_\_\_99

The next section asks about your use of alcohol, drugs and gambling. I want you to tell me which option best describes how often you have done the following in the past 3 months.

|                                                                                                                               | Never<br>=1 | Rarely<br>=2 | Someti<br>mes =3 | Ofte<br>n=4 | I<br>don't<br>know<br>=97 | Refuse<br>to<br>answer<br>=99 |
|-------------------------------------------------------------------------------------------------------------------------------|-------------|--------------|------------------|-------------|---------------------------|-------------------------------|
| 143. Alcohol or related fermented drinks (like <i>haat bhatti</i> or <i>desi daru</i> )                                       | 1           | 2            | 3                | 4           | 97                        | 99                            |
| 144. Drugs or mind-altering substances (like <i>ganja</i> , sniffing whitener, raw ink, <i>Iodex</i> , <i>bhang</i> or other) | 1           | 2            | 3                | 4           | 97                        | 99                            |
| 145. Bet for money or gambled                                                                                                 | 1           | 2            | 3                | 4           | 97                        | 99                            |

We have now reached the final set of questions. The next section asks about stress in your life and how you deal with it. Are you ready?

First, I am going to read you a couple of scenarios or problems. Please tell me whether you have experienced stress due to them in the past 3 months.

|                                                                                     | Yes=1 | No=0 | Refuse<br>to<br>answer=<br>99 |
|-------------------------------------------------------------------------------------|-------|------|-------------------------------|
| 146. Financial trouble or debt                                                      | 1     | 0    | 99                            |
| 147. A land dispute/court case                                                      | 1     | 0    | 99                            |
| 148. Not having continuous employment                                               | 1     | 0    | 99                            |
| 149. Your poor health                                                               | 1     | 0    | 99                            |
| 150. Your spouse's poor health                                                      | 1     | 0    | 99                            |
| 151. Illness or death in your family                                                | 1     | 0    | 99                            |
| 152. Problems with marital relations                                                | 1     | 0    | 99                            |
| 153. Problems with familial relations                                               | 1     | 0    | 99                            |
| 154. Difficulty with bearing children                                               | 1     | 0    | 99                            |
| 155. Abortion/s                                                                     | 1     | 0    | 99                            |
| 156. Mistreatment or abuse by your boss at the workplace                            | 1     | 0    | 99                            |
| 157. Discrimination or poor treatment because of caste, religion, or migrant status | 1     | 0    | 99                            |
| 158. Problems with access to water, electricity, gas, or toilet facility            | 1     | 0    | 99                            |
| 159. Dislocation or eviction from your home                                         | 1     | 0    | 99                            |
| 160. Crowded or non-hygienic living conditions                                      | 1     | 0    | 99                            |
| 161. Neighborhood crime or problems with the safety of your family                  | 1     | 0    | 99                            |
| 162. Noise                                                                          | 1     | 0    | 99                            |
| 163. Other _____                                                                    | 1     | 0    | 99                            |

164. During the past 3 months how often have you felt stressed (tension)?

- Never \_\_\_\_\_ 1
- Rarely \_\_\_\_\_ 2
- Sometimes \_\_\_\_\_ 3
- Often \_\_\_\_\_ 4
- Refuse to answer \_\_\_\_\_ 99

Please indicate how much you agree with the following statements as they apply to you over the last month. If a particular situation has not occurred recently, answer according to how you think you would have felt.

165. I am able to adapt when change occurs

- Not true at all \_\_\_\_\_ 1
- Rarely true \_\_\_\_\_ 2
- Sometimes true \_\_\_\_\_ 3
- Often true \_\_\_\_\_ 4
- True nearly all the time \_\_\_\_\_ 5
- Refuse to answer \_\_\_\_\_ 99

166. I can deal with whatever comes my way

- Not true at all \_\_\_\_\_ 1
- Rarely true \_\_\_\_\_ 2
- Sometimes true \_\_\_\_\_ 3
- Often true \_\_\_\_\_ 4
- True nearly all the time \_\_\_\_\_ 5
- Refuse to answer \_\_\_\_\_ 99

167. I try to see the humorous side of things when I am faced with problems.

- Not true at all \_\_\_\_\_ 1
- Rarely true \_\_\_\_\_ 2
- Sometimes true \_\_\_\_\_ 3
- Often true \_\_\_\_\_ 4
- True nearly all the time \_\_\_\_\_ 5
- Refuse to answer \_\_\_\_\_ 99

168. Having to cope with stress can make me stronger

- Not true at all \_\_\_\_\_ 1
- Rarely true \_\_\_\_\_ 2
- Sometimes true \_\_\_\_\_ 3
- Often true \_\_\_\_\_ 4
- True nearly all the time \_\_\_\_\_ 5
- Refuse to answer \_\_\_\_\_ 99

169. I tend to bounce back after illness, injury or other hardships

- Not true at all \_\_\_\_\_ 1
- Rarely true \_\_\_\_\_ 2
- Sometimes true \_\_\_\_\_ 3
- Often true \_\_\_\_\_ 4
- True nearly all the time \_\_\_\_\_ 5
- Refuse to answer \_\_\_\_\_ 99

170. I believe I can achieve my goals, even if there are obstacles

- Not true at all \_\_\_\_\_ 1
- Rarely true \_\_\_\_\_ 2
- Sometimes true \_\_\_\_\_ 3
- Often true \_\_\_\_\_ 4
- True nearly all the time \_\_\_\_\_ 5
- Refuse to answer \_\_\_\_\_ 99

171. Under pressure, I can stay focused and think clearly.

- Not true at all \_\_\_\_\_ 1
- Rarely true \_\_\_\_\_ 2
- Sometimes true \_\_\_\_\_ 3
- Often true \_\_\_\_\_ 4
- True nearly all the time \_\_\_\_\_ 5
- Refuse to answer \_\_\_\_\_ 99

172. I am not easily discouraged by failure

- Not true at all \_\_\_\_\_ 1
- Rarely true \_\_\_\_\_ 2
- Sometimes true \_\_\_\_\_ 3
- Often true \_\_\_\_\_ 4
- True nearly all the time \_\_\_\_\_ 5
- Refuse to answer \_\_\_\_\_ 99

173. I think of myself as a strong person when dealing with life's challenges and difficulties.

- Not true at all \_\_\_\_\_ 1
- Rarely true \_\_\_\_\_ 2
- Sometimes true \_\_\_\_\_ 3
- Often true \_\_\_\_\_ 4
- True nearly all the time \_\_\_\_\_ 5
- Refuse to answer \_\_\_\_\_ 99

174. I am able to handle unpleasant or painful feelings like sadness, fear, and anger.

- Not true at all \_\_\_\_\_ 1
- Rarely true \_\_\_\_\_ 2
- Sometimes true \_\_\_\_\_ 3
- Often true \_\_\_\_\_ 4
- True nearly all the time \_\_\_\_\_ 5
- Refuse to answer \_\_\_\_\_ 99

175. People often experience events that cause stress and deal with them in different ways. Please tell me the two most common ways you deal with stress:

1. \_\_\_\_\_  
\_\_\_\_\_
2. \_\_\_\_\_  
\_\_\_\_\_

176. Who is the one person you feel most comfortable talking to about stress or trouble in your life:

- Friend \_\_\_\_\_ 1
- Mother \_\_\_\_\_ 2
- Father \_\_\_\_\_ 3
- Sibling \_\_\_\_\_ 4
- In-laws \_\_\_\_\_ 5
- Spouse \_\_\_\_\_ 6
- Doctor, nurse, or counselor \_\_\_\_\_ 7
- Other \_\_\_\_\_ 8 (specify) \_\_\_\_\_
- Nobody \_\_\_\_\_ 9
- Refuse to answer \_\_\_\_\_ 99

177. When there is conflict between your spouse and your parents or your spouse and other members of your family how often do you support your spouse?

- Never \_\_\_\_\_ 1
- Rarely \_\_\_\_\_ 2
- Sometimes \_\_\_\_\_ 3
- Often \_\_\_\_\_ 4
- Not applicable \_\_\_\_\_ 98
- Refuse to answer \_\_\_\_\_ 99

178. If there were a problem with your marriage (your husband-wife relationship), who would be the one biggest source of support for you?

- Friend \_\_\_\_\_ 1
- Mother \_\_\_\_\_ 2
- Father \_\_\_\_\_ 3
- Sibling \_\_\_\_\_ 4
- In-laws \_\_\_\_\_ 5
- Other \_\_\_\_\_ 6 (specify) \_\_\_\_\_
- Nobody \_\_\_\_\_ 7
- Refuse to answer \_\_\_\_\_ 99

179. If there were trouble in your marriage (your husband-wife relationship), how supported do you think you would feel by your parents and other members of your own family?

- Not at all \_\_\_\_\_ 1
- Very little \_\_\_\_\_ 2
- Somewhat \_\_\_\_\_ 3
- To a great extent \_\_\_\_\_ 4
- Refuse to answer \_\_\_\_\_ 99

Lastly, I want you to think a little bit more about your relationship with your spouse.

180. What are the main causes of disharmony in your marriage?

---

---

---

181. What are the main causes of happiness in your marriage?

---

---

---

182. If you could change one thing about your marriage today, what would it be?

---

---

---



**Debriefing Notes:**

---

---

---

---

---

- *Ask participant if they have any questions about the study and attempt to answer to the best of your ability.*
- *Clarify misconceptions regarding health knowledge.*
- *Offer to help refer the participants to the local community resources.*

**End time** \_\_\_\_\_

**Coupons:**

- Participant accepted
- Participant declined

**QC completed by interviewer before leaving field:** *(initials)* \_\_\_\_\_

**QC completed by DEO:**

- Date \_\_\_\_\_ / \_\_\_\_\_ / \_\_\_\_\_

**QC completed by RS-1:**

- Date \_\_\_\_\_ / \_\_\_\_\_ / \_\_\_\_\_

- All rights are reserved on the aforementioned RISC-10 Scale (questions 165-174). No part of this document may be reproduced or transmitted in any form, or by any means, electronic or mechanical, including photocopying, or by any information storage or retrieval system, without permission from Dr. Davidson at [mail@cd-risc.com](mailto:mail@cd-risc.com). Further information about the scale and terms of use can be found at [www.cd-risc.com](http://www.cd-risc.com). Copyright ©2001, 2014 by Kathryn M. Connor, M.D., and Jonathan R.T. Davidson, M.D. This version of the scale was developed as a work made for hire by Laura Campbell-Siles, PhD., and Murray B. Stein, M.D.

**Important definitions for the interviewer/reader:**

- *A husband's family= his mother, his father, his brother, or his sister.*
- *Spouse's natal family= the family into which the spouse was born. That includes her mother, her father, her brother, or her sister.*
- *Sex=either vaginal, anal, or oral sex unless we specify a specific type of sex in the question.*
